# Supplementary material for: Impact of metabolism and temperature on 2 H ∕ 1 H fractionation in lipids of the marine bacterium Shewanella piezotolerans WP3
Source: Copernicus journal article supplement (doi:10.5194/bg-20-1491-2023), 2023-04-14
Supplement: Supplementary file 1 [file bg-20-1491-2023-supplement.pdf]

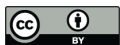

*Supplement of*

**Impact of metabolism and temperature on  $^2\text{H} / ^1\text{H}$  fractionation in lipids of the marine bacterium *Shewanella piezotolerans* WP3**

**Xin Chen et al.**

*Correspondence to:* Fengping Wang (fengpingw@sjtu.edu.cn)

The copyright of individual parts of the supplement might differ from the article licence.

Figure S1. The values of  $^2\text{H}/^1\text{H}$  fractionation of fatty acids in *S. piezotolerans* WP3 growing on different organic substrates. (a) *i*C<sub>15</sub> fatty acid; (b) C<sub>16:1</sub> fatty acid; (c) C<sub>16</sub> fatty acid; (d) abundance-weighted average  $\epsilon_{\text{FA}/\text{Water}}$  values of fatty acids.

Figure S2. The values of  $^2\text{H}/^1\text{H}$  fractionation of fatty acids in *S. piezotolerans* WP3 growing on different temperatures. (a) *i*C<sub>15</sub> fatty acid; (b) C<sub>16:1</sub> fatty acid; (c) C<sub>16</sub> fatty acid; (d) C<sub>18:1</sub> fatty acid.

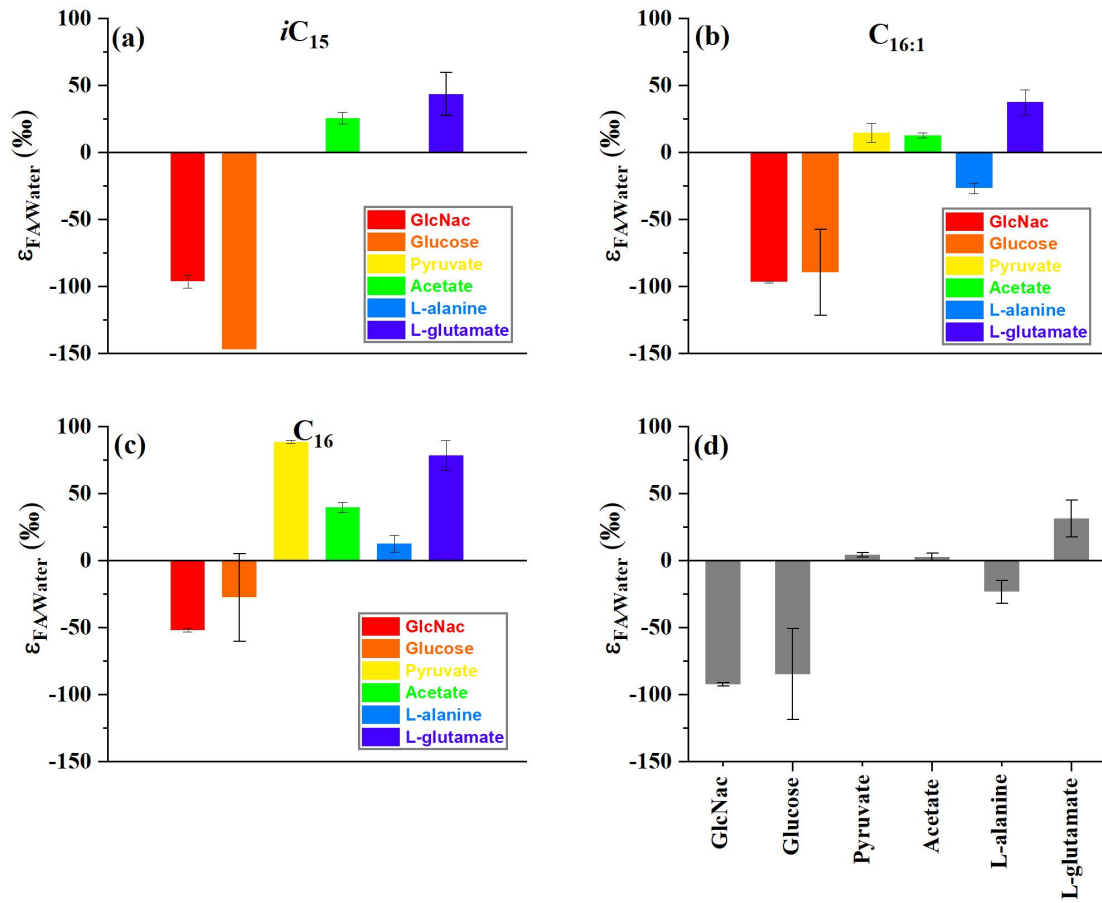

Figure S1.

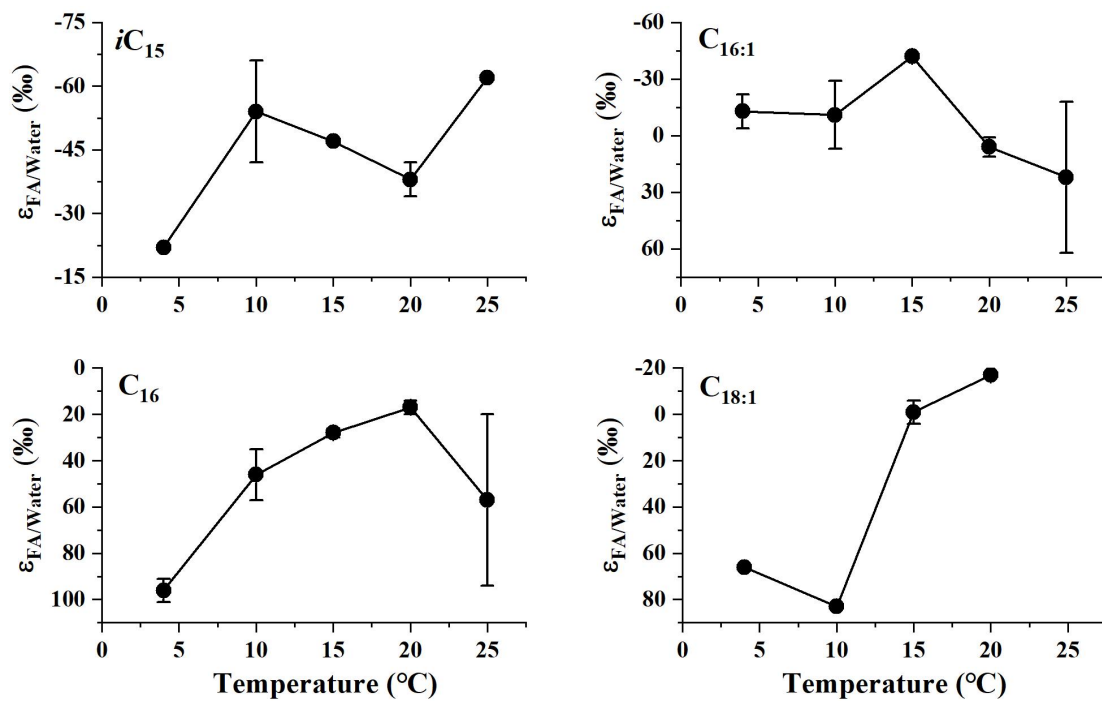

Figure S2.
